# Supplementary material for: Glutamate Excitotoxicity Inflicts Paranodal Myelin Splitting and Retraction
Source: PubMed Central journal article supplement (PMC2725320; doi:10.1371/journal.pone.0006705), 2009-08-20
Supplement: pone.0006705.s003.pdf [file pone.0006705.s003.pdf]

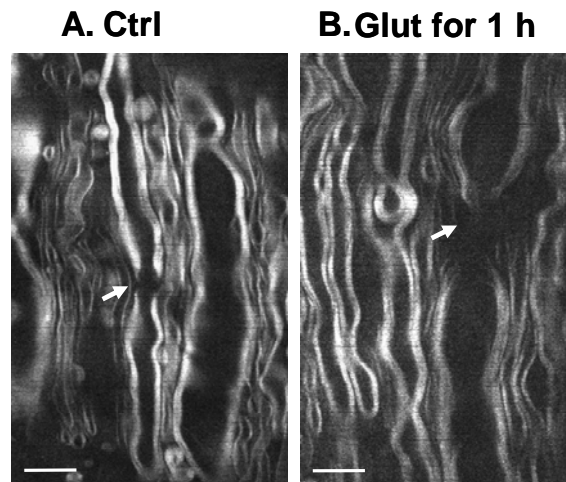

**Figure S3. Temperature effect on glutamate-induced paranodal myelin retraction.** (A) CARS image of a node of Ranvier (indicated by arrow) when the spinal tissue was incubated in Krebs' solution at 37 °C for 2 h. (B) CARS image showing the retraction of paranodal myelin (indicated by arrow) when the spinal tissue was incubated with 1 mM glutamate at 37 °C for 1 h. Bar = 10  $\mu$ m.
